# Supplementary material for: circFLT1 and lncCCPG1 Sponges miR-93 to Regulate the Proliferation and Differentiation of Adipocytes by Promoting lncSLC30A9 Expression
Source: PubMed Central journal article supplement (PMC7554329; doi:10.1016/j.omtn.2020.09.011), 2020-09-16
Supplement: mmc1.pdf [file mmc1.pdf]

OMTN, Volume 22

## Supplemental Information

**circFLT1 and lncCCPG1 Sponges miR-93 to Regulate  
the Proliferation and Differentiation of  
Adipocytes by Promoting lncSLC30A9 Expression**

**Zihong Kang, Sihuang Zhang, Enhui Jiang, Xinyu Wang, Zhen Wang, Hong  
Chen, and Xianyong Lan**

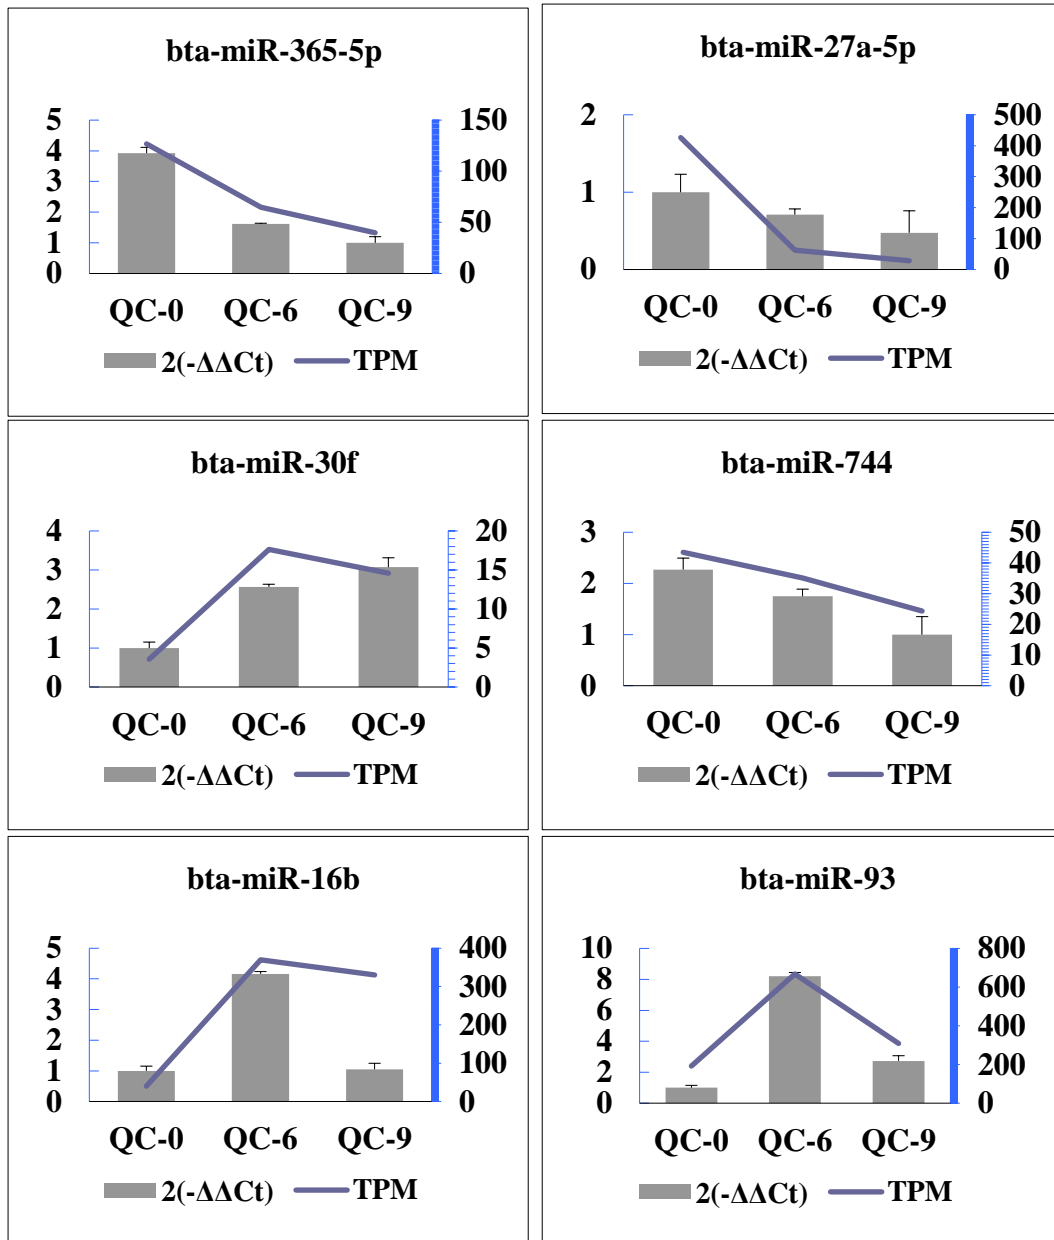

Supplementary Figure 1. RT-qPCR verified the sequencing results.

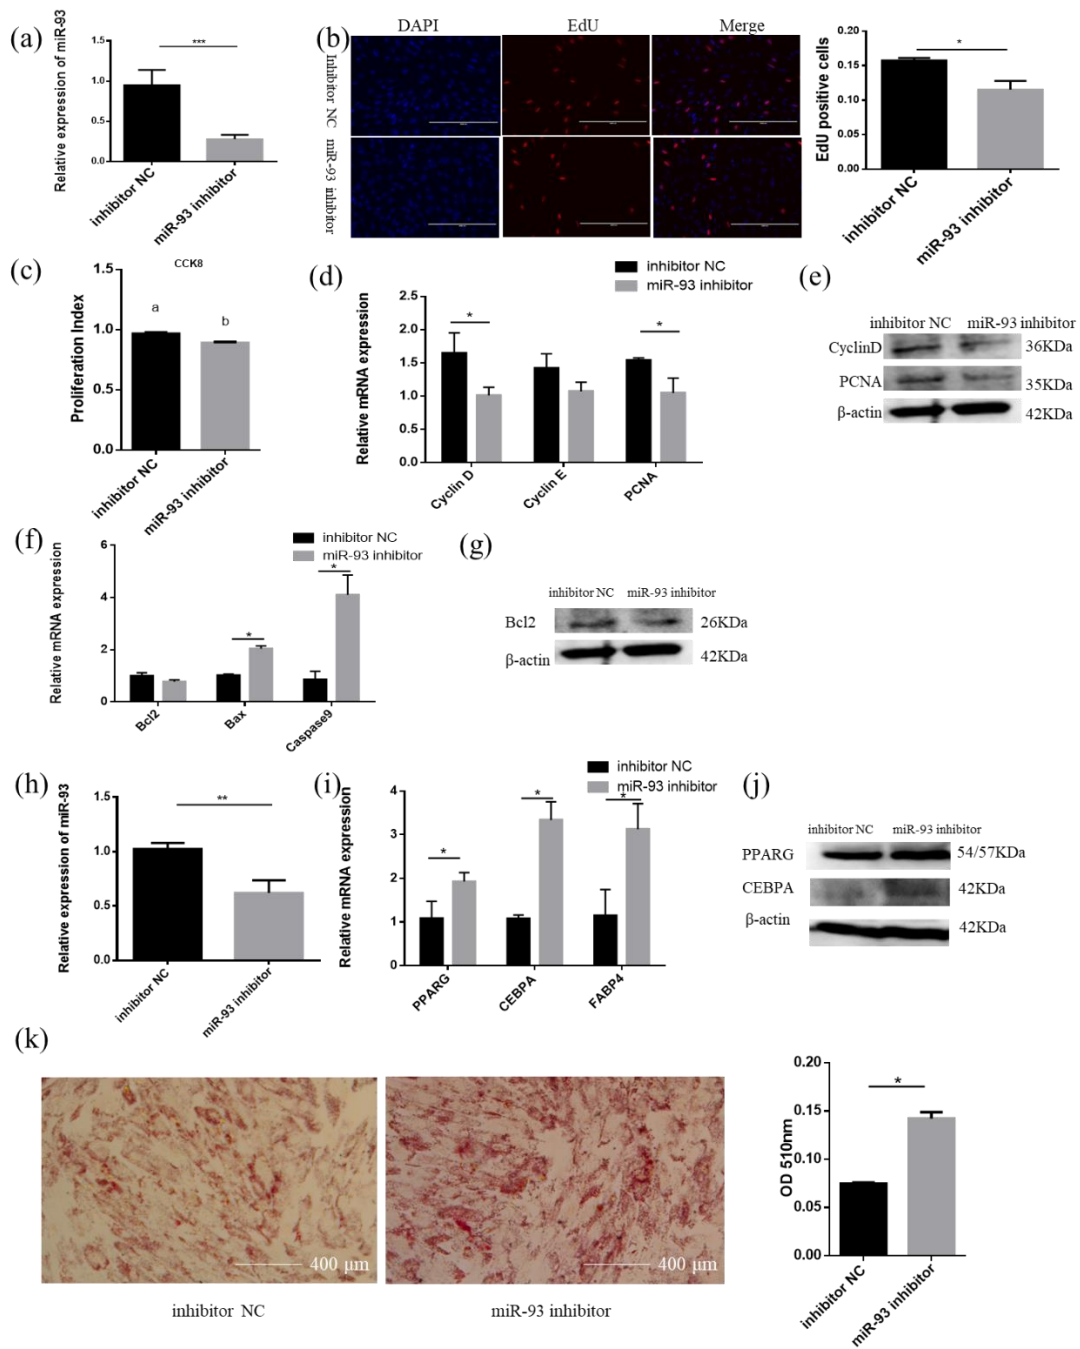

**Supplementary Figure 2.** Effect of miR-93 on proliferation, apoptosis, and differentiation of adipocytes. (a) Know down efficiency of miR-93; (b) Cell proliferation was measured with 5-ethynyl-20-deoxyuridine (EdU); (c) Cell proliferation index was measured by cell counting kit-8 (CCK-8) assay; (d)(e) The expression of proliferation marker genes were measured by real-time qPCR and western blotting. (f)(g) The expression of apoptosis marker genes were measured by real-time qPCR and western blotting. (h) Know down efficiency of miR-93;(i,j) The mRNA and protein expression of cell differentiation markers were measured by real-time qPCR and western blotting. (k) Oil red O staining was used to detect the production of lipid droplet. Values are mean  $\pm$  SEM for three biological replicates, the different letters (a, b) means  $P < 0.05$ ; \* $P < 0.05$ ; \*\* $P < 0.01$ ; \*\*\* $P < 0.01$ .

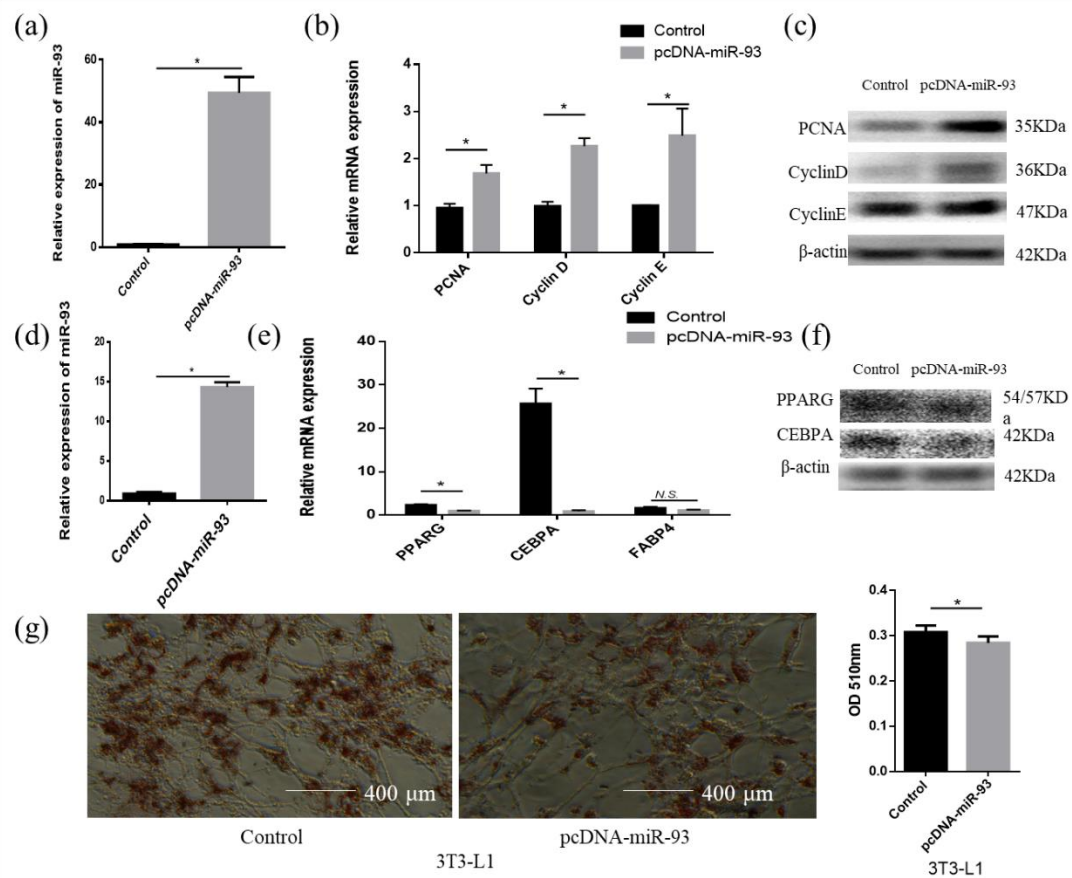

**Supplementary Figure 3.** Effect of miR-93 overexpression on 3T3-L1 cell proliferation and differentiation. (a) Overexpression efficiency of miR-93. (b,c) Expression of the proliferation marker genes were measured with real-time qPCR and western blotting. (d) Overexpression efficiency of miR-93. (e,f) The mRNA and protein expression of cell differentiation markers were measured with real-time qPCR and western blotting. (g) Oil Red O staining was used to detect the production of lipid droplet. Values are presented as mean  $\pm$  SEM for three biological replicates, \* $P < 0.05$ .

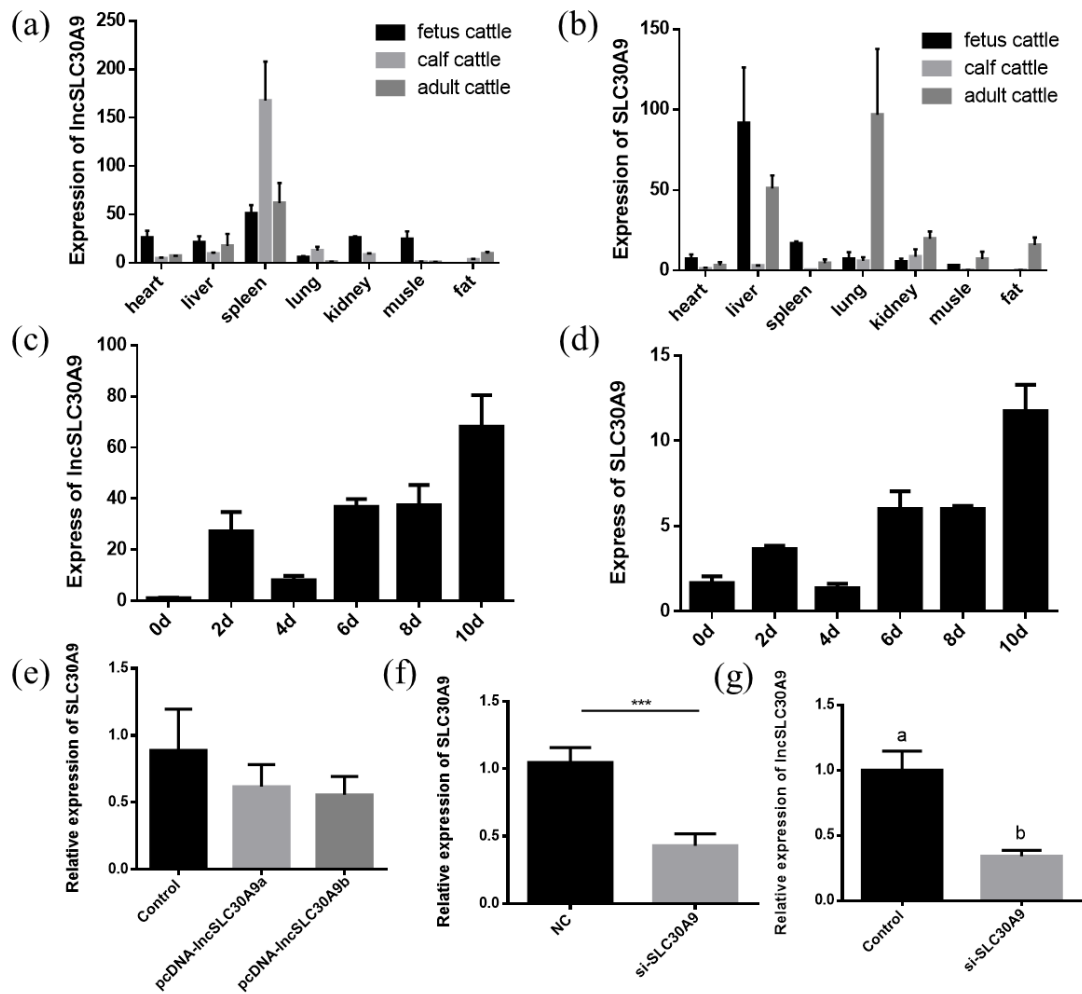

**Supplementary Figure 4.** Expression pattern of lncSLC30A9 and its maternal gene SLC30A9. (a) lncSLC30A9 tissue expression profile. (b) SLC30A9 tissue expression profile. (c) lncSLC30A9 was expressed at different time series. (d) SLC30A9 was expressed at different time series. (e) The influence of lncSLC30A9 on the expression of SLC30A9. (f) Knock down efficiency of SLC30A9. (g) The influence of SLC30A9 on the expression of lncSLC30A9. Values are presented as mean  $\pm$  SEM for three biological replicates. Different letters (a, b) indicate significant differences  $P < 0.05$ ;  $***P < 0.001$ .

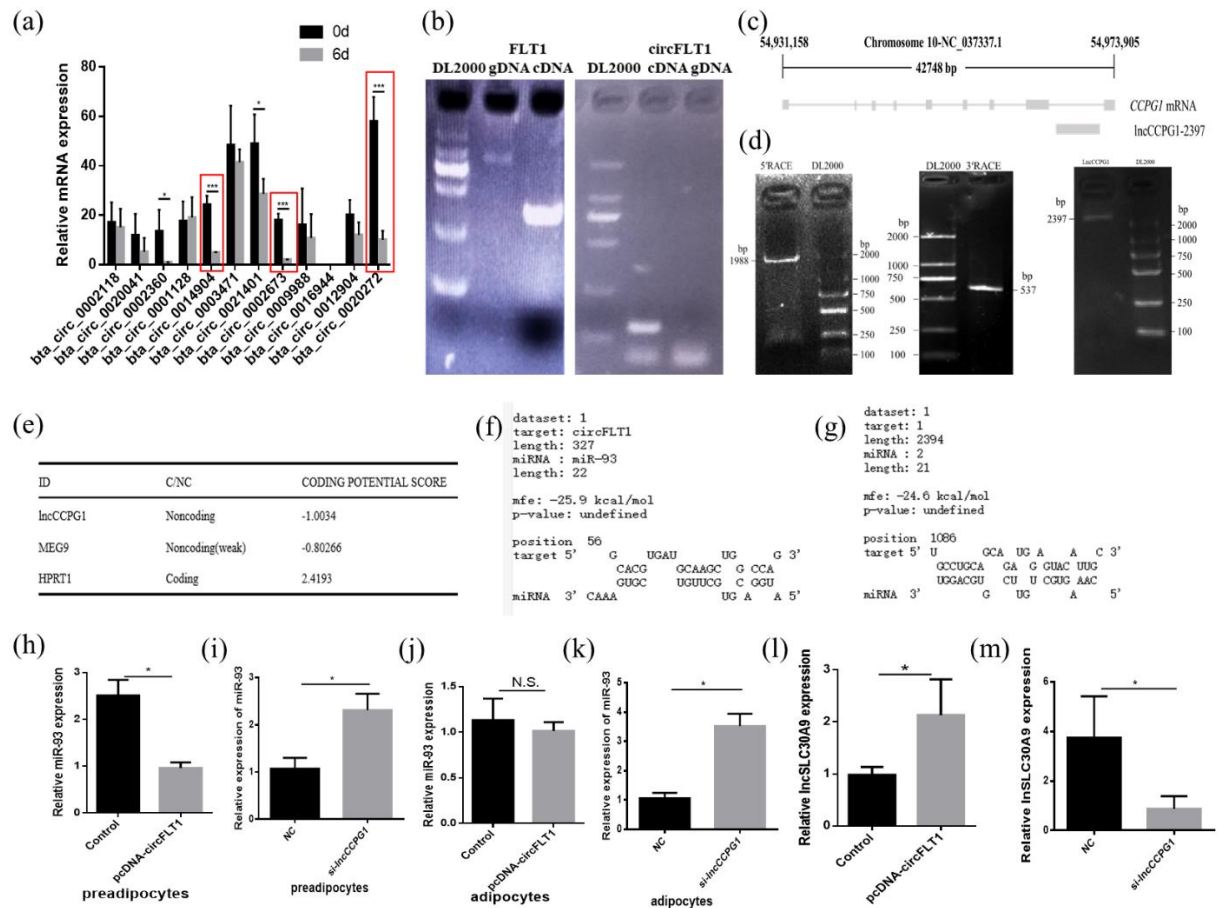

**Supplementary Figure 5.** circFLT1 and lncCCPG1 identification and interaction analysis. (a) circFLT1 screening. (b) Authenticity of circFLT1 verification. (c) Genomic structures of lncCCPG1. (d) The 5'RACE and 3'RACE analyses demonstrated the full length of lncCCPG1. (e) The RNA sequences of lncCCPG1 were processed by the Coding Potential Calculator (CPC) program and were predicted to be non-coding RNAs. (f,g) The RNAhybrid tool predicted the miR-93 binding sites at one distinct position in circFLT1 and lncCCPG1. (h-k) circFLT1 overexpression or lncCCPG1 knockdown effect the relative abundance of miR-93. (l,m) circFLT1 overexpression or lncCCPG1 knockdown effect the relative abundance of lncSLC30A9. Values are presented as mean  $\pm$  SEM for three biological replicates, \* $P < 0.05$ ; \*\*\* $P < 0.001$ .

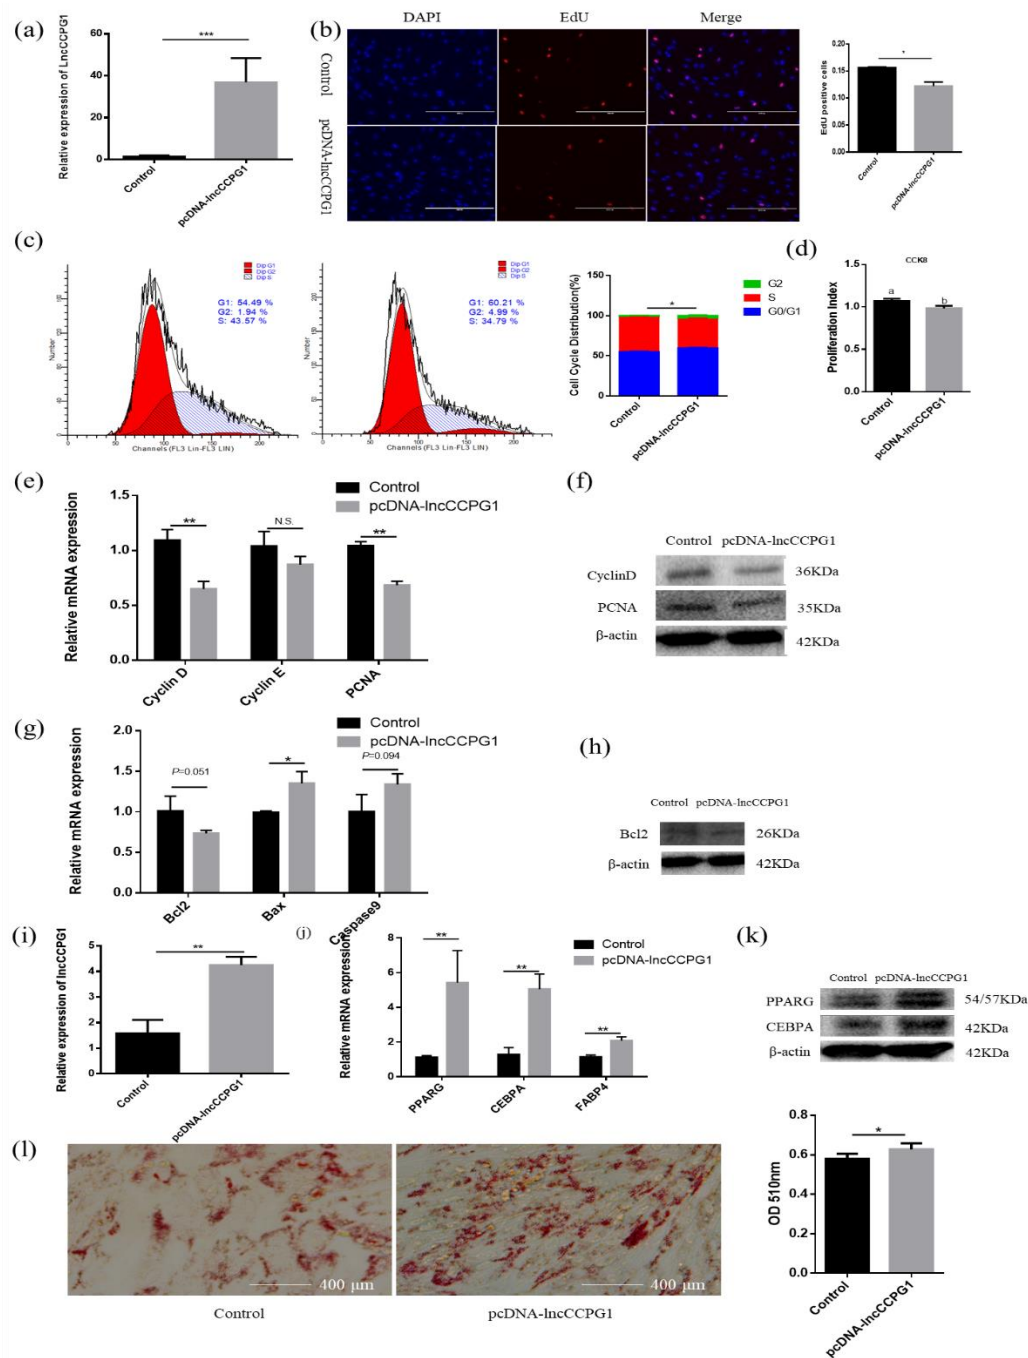

**Supplementary Figure 6.** Effect of lncCCPG1 on proliferation, apoptosis, and differentiation of adipocytes. (a) Overexpression efficiency of lncCCPG1; (b) Cell proliferation was measured with 5-ethynyl-20-deoxyuridine (EdU); (c) cell phase analyzed by flow cytometry; (d) Cell proliferation index was measured by cell counting kit-8 (CCK-8) assay; (e,f) The expression of proliferation marker genes were measured by real-time qPCR and western blotting. (g,h) The expression of apoptosis marker genes were measured by real-time qPCR and western blotting. (i) Overexpression efficiency of lncCCPG1; (j,k) The mRNA and protein expression of cell differentiation markers were measured by real-time qPCR and western blotting. (l) Oil red O staining was used to detect the production of lipid droplet. Values are mean  $\pm$  SEM for three biological replicates, the different letters (a, b) means  $P < 0.05$ ; \* $P < 0.05$ ; \*\* $P < 0.01$ .





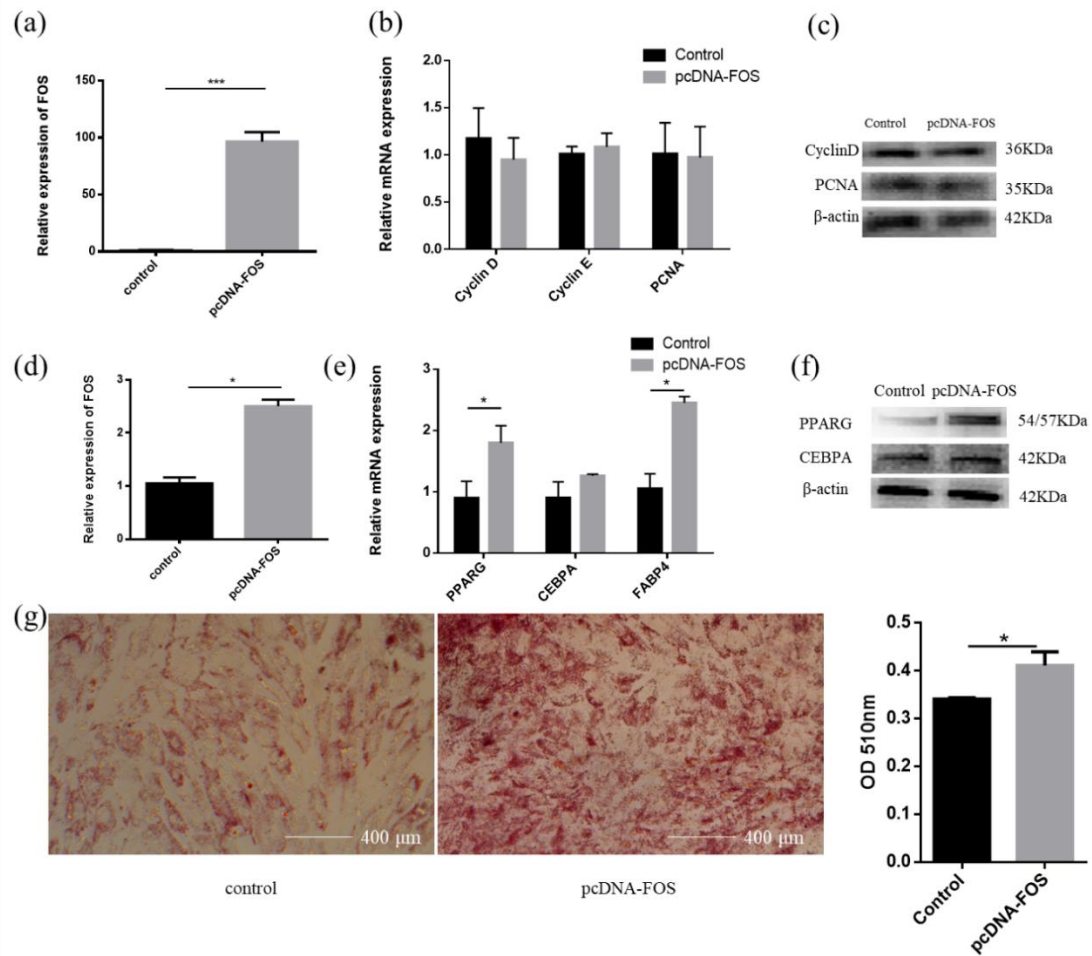

**Supplementary Figure 8.** Effect of *FOS* on proliferation and differentiation of adipocytes. (a) Overexpression efficiency of *FOS*; (b) (c) The expression of proliferation marker genes were measured by real-time qPCR and western blotting. (d) Overexpression efficiency of *FOS*; (e,f) The mRNA and protein expression of cell differentiation markers were measured by real-time qPCR and western blotting. (g) Oil red O staining was used to detect the production of lipid droplet. Values are mean  $\pm$  SEM for three biological replicates, \* $P < 0.05$ ; \*\*\* $P < 0.001$ .

Supplementary Table 1. Primers sequence for PCR and qRT-PCR  
(submitted as a separate file)

**Supplementary Table 2.** The primary antibody and secondary antibody

| <b>Antibody name</b> | <b>Purpose</b>     | <b>Source</b> | <b>Catalogue Number</b> |
|----------------------|--------------------|---------------|-------------------------|
| Actin                | primary antibody   | Abbkine       | WL01372                 |
| PPARG                | primary antibody   | Wanleibio     | WL01800                 |
| CEBPA                | primary antibody   | Wanleibio     | WL01899                 |
| PCNA                 | primary antibody   | Wanleibio     | WL02809                 |
| CyclinD1             | primary antibody   | Wanleibio     | WL01435a                |
| CyclinE              | primary antibody   | Wanleibio     | WL01072                 |
| Bcl-2                | primary antibody   | Wanleibio     | WL01556                 |
| AKT                  | primary antibody   | Wanleibio     | WL0003b                 |
| pAKT                 | primary antibody   | Wanleibio     | WLP001a                 |
| Goat Anti-Rabbit     | secondary antibody | BOSTER        | BA1041                  |

## **LncRNA and circRNA sequence information**

### **Lnc30A9a-1296nt**

CTAGAGACCTTTATGCTTAAACATGGAGAAAATATTATTGATACTTTAGGAGCTGAAGTA  
GATAGACTTGAGAAGGAACTGAAAAACGAAATCCTGAAGTTCGACATGTAGATTTAGAG  
ATATTATAAACTTGATGGGATGAATCACCTTGGAGGGAGCCTTGAACCAAGTTTGCCAA  
GACTACTTTCCACCCTGAGGGAGTCAATGCCATTCAGAAGCCGTTTATTTGAAGATGGAG  
GAAGTATTTATATGAAAAGGGCAATTCAACAGTCCATAGAACTAAAACAGCTTCTTCTAA  
GAGACCTATTACAAGTTGAATCAATTTGGAAATCATGTTTTTATGTTTCAATGGAAACGTT  
TTAGTTACTTAAATTGTTTCATAATTTCTTACTTTAGCCTGTCAGTGTGTATTGTACCTGCAA  
TCATGTTTCCTTCCTTCACATGGGTAAAAATAAGCAGCATCCGTAAGATTATGATTTTTTAT  
TTTGTGGCCAGTGAAGATTTCACTCCATCAAAACCTGTCAATCTTGAACATTCTGGCTAAA  
TCTTGTATTCTGGTTTTTGAACAGTCACTCCATTTTCAAAGTCTGTCTTTCCTTACAGAAT  
GTAGAAATTATTTGACATAGGTTGTCAAACCTGAGCACTAAGAGGAACACTGTGCGTAAT  
AACTTGGTTATCCATAAATGTTTCATTCCAATAGGACTCTGTTACTGAATTGAAGGAAGATA  
ACTTCAGTACACTCTTTTAGGTCATGCTAGTTGCCATTTTGTAAAATTTCTTTTCTCCTTT  
GTTTTTTTTCCTTATTTAGTTTAATTTTTCTAATGGTAGGAAATATAAAATAACCCTAGATGT  
TTCCATGGGCCAGTGTGATGACTGGTTTTTGTAGTTTTTGTTTTTTTTAACTGGCTCCAATGCT  
GCCATGTGTATTTACTAGGAGATAATGCATTTATAAGTATTTTAAACATTCTGTAAAGTGGA  
CTAGAAATATTTATAATTTTACAGACACCACAGCATTTTATTTTAAATTTATTTTAAAAGAG  
GCACTACTTATGTAAATCTGAACTGTGTGATATTTCTTGCTTTAAGAGATAGAGACATAAA  
CCTCTTATACAAAACTTGTGACCATGACTTTGTTTAATATCATAGTCAATAGTGTAACAT  
GAGTTTCTTGCAGTTACAAATGGGCATTTAGCATAAAGTATGATTATAAATTATGTAAGTA  
GCTTCTGATGATCATAAAGTATCAAGGTGAAAAACATAATTCAGTAATTA AAAACTGA  
GTGCAAAACTACA

### **Lnc30A9b-848nt**

TAAAAATAAGCAGCATCCGTAAGATTATGATTTTTTATTTTGTGGCCAGTGAAGATTTAC  
TCCATCAAAACCTGTCAATCTTGAACATTCTGGCTAAATCTTGTATTCTGGTTTTTGAACA  
GTCACTCCATTTTCAAAGTCTGTCTTTCCTTACAGAATGTAGAAATTATTTGACATAGGTT  
GTCAAACCTGAGCACTAAGAGGAACACTGTCGTAATAACTTGGTTATCCATAAATGTTTCAT  
TCCAATAGGACTCTGTTACTGAATTGAAGGAAGATAACTTCAGTACACTCTTTTAGGTCAT  
GCTAGTTGCCATTTTGTAAAATTTCTTTTCTCCTTTGTTTTTTTTCCTTATTTAGTTTAATTT  
TTCTAATGGTAGGAAATATAAAATAACCCTAGATGTTTCCATGGGCCAGTGTGATGACTG  
GTTTTTAGTTTTTGTTTTTTTTAACTGGCTCCAATGCTGCCATGTGTATTTACTAGGAGATA  
ATGCATTTATAAGTATTTTAAACATTCTGTAAAGTGGACTAGAAATATTTATAATTTTACAG  
ACACCACAGCATTTTATTTTAAATTTATTTTAAAAGAGGCACTACTTATGTAAATCTGAAC  
TGTGTGATATTTCTTGCTTTAAGAGATAGAGACATAAACCTCTTATACAAAACTTGTGAC  
CATGACTTTGTTTAATATCATAGTCAATAGTGTAACATGAGTTTCTTGCAGTTACAAATGG  
GCATTTAGCATAAAGTATGATTATAAATTATGTAAGTAGCTTTCTGATGATCATAAAGTAT  
CAAGGTGAAAAACATAATTCAGTAATTA AAAACTGAGTGCAAAACTACA

### **LncCCPG1-2397nt**

GGGGGGTTAGTCTGCATATGACCTATGGTCAGCCCTCTGTATCAGCATTTCTGCATCTGAG  
GATTCAACCAGCCACAGACCATGTAGTACTGAAGTATTTACTATTGAAAGATATCCAGGT  
ATAAATAGACCCAAGCAGTGCAAACCCACATTGTTCAAGGGTCAGCTGTATTTGTTGTA  
AAGTACTTTTTGTAAACAAAAGTACTATTTGTA AAAAGTATTTTATTGCCTTGGAAATTCAGG

ATAAATTGAAAGATTAAATTTTAAAGTTAAAATCTATTACAAACTGAAAATTTTCATAAAATC  
AGTTTGACTTGAGCAAATGGTTTAAATTTCTACCTTAAAAAATCTGAGGATATAAAATTCTA  
TTTTAGCCTATTTTCATTTTTTTTCATTATACTTTATATGAAAAGATAATCACCTTAAGTTATTT  
CCTTAATCTTTTATTTACTCACTCAACTCTGGGAAGCTAGGAGTGAAAAATACAAATTTCA  
CTTTGAAATCAGAGTAACAATTCAAGTGTCCCACTTGCTTTGTCTATTCTACTTACCAACTA  
AATTATGATATTTAATACATTTATTATAGAATTATTATTGGTAGAGGCATGATCAAAGGGG  
TAAACTTTGCAAGCCACAAGTTCTCATGCGTGTGCTTTATATATAACCTTTAAAAATAACA  
TTGTATTATCCATTGCTTACCAGCTTTCTATTCTGTAACACAAAACCTCCTAATCTTTGAA  
TGTTAGCTTTATTTTTTAACCTTTGAGATATTTTTCTCTATATAGCTTTTTGAATAAACGTA  
ATGTGTCAATAAAATAATGAGACTGATTTTGGTGTCTTTAGTCATTAATAACATATCTAGA  
GCAAAGTACTGTGAGGCTGTCTGAGGAAAGAAATGAAAAATTCTTGCTGTCAAGGAGCT  
CAGAAGCTTTTGGAGAATTAGGTCAATACAAGAAATGCAGTGGAGATGTGGAGGCATATT  
ATATGCTGGCCTCAGTCAACAGATGTTTGGGAAGGCTTCATAATAAGATGGCCTTTGAGCT  
GAACTTCTTTTTAACTGGTTTTTTGAAGAAGTAGTGAAAACCTGCCTGCAGCAGATGGAGTA  
CATTGCACTCAAAGGGAACCTTCATTTGCACTGATTTGGAGATGTGAAGACATGCTGTGTTA  
AGGAGACAAGGTAGAGGTGGGGGGTAAACAGAAGAAAAGATTCAGATCATGAAGAACTT  
TTATGCTGGAGGACTTGTTTTATTGCATTTTGGGTCACTGGCAGCAGCCTGAAGGGTTTAT  
TGGAAAGAGTGAAGCTAGATGCTGAAAAGTGGTTTTTGAATGATACAGACATGAGCTGA  
TGAGTATCTGAACTAGGGCAGTAGCAGGAATAGAAAGGAGGGGACAGATTTGAACGGTA  
TATAGTAAGTAAAATCGGTGCTATTTCTTGTGAAATAGAAGTAGAAAGTAACAATGCCTTT  
TGAGATTTCTGGGTTGGGTCACTAGTTATATAGTTACATATATATGTCTATAGTTATAGGT  
GTGTGTGTATATATATGTATATTCTATATATATAACTGTTTAGTTATATATGGACATTAG  
CTACACTAAGGAATACCAGGGCTTGGGTGAGGGGAATTGAAAATGAGAATTGTGGTTGGT  
ATTTATTGACATAAGTAGGGAGAATTTGTTGGCCATTAGTTATGTGACTCTGTCTCTAGTC  
CAGACTCTGTATATGTAGATAGTCTAGGCTGGAGGTGTTTATCAGACTCCTGAAGAACACC  
AACATCTAAGGGATTGTAGAGAAAGAAGGCTGAGAATGAATGATGGGCAGAGAGTGGCA  
TTGTGAAAATCGAAAATCATCTCAAGTAAAAGGAATAATGTTACATGCTGCCCCCCCCGCC  
CCCCAAAAAAGAATGGATGCTTGGTTGGGAATTGGACGGCCATGGAGTGTTTTTGTGTA  
AGTAGTGACAAAGGTGTGATTATGGAGATCAAGAACTACATGTAGATATTGTTTATAAGC  
CTTAGCTGTTAGAGCATGCATGCGCATGCAGAAAAGAGGGAGGGAGGGAGGAACCTGTT  
GGAACCTGTGTATGTATCCCTGCTGAGGGAGGAAGCCACTTGGGGAGGGGGAATTAATTTT  
AATAGGAAAGGAGAAAAAATAATGGAAACACATCTCATTATTTTATTGTCACATTTCTATT  
TATCTTTTGTAGTGTTCCTGTTTGGCAGCACAGTTATGTTTGTCCATTTTTTCTTTCTGTA  
GGATAAAAGTATAAACTCACTGAAATCTTTTTTATATGGTTATACTAGGATTATATACTTC  
AGATTCATTTACTATCCTTTTTTTCAGTGTTTCAGATAATAGATTAATGGAGAAAAAACATTA  
AATTGTTTCTTGTTTAAATA

**FLT1-327nt**

**GATCTAGTTCAAGTTCAATATTAAGAC**ATCCTGAACTGAGTTTAAAAGGCACCCGGCACGTG  
ATGCAAGCTGGCCAGACGCTGAATCTCAAATGCAGAGGAGGAGCTGCCCATGCCTGGTATC  
TGCCTGAAGCTGTGAACAGGGAAAACCAAAGCGGGAAGCTTAACATCACTAAGTCTGCCT  
GTGGAAGAACCTCAAGAAATTCTGCAGCACTTTGACCTTGAACGCGGCTCAGGCCAACCC  
ACACTGGCTTCTATAGCTGCAGATATCTCTCTGCACCTGCTTCCAAGAACAAAGCAG**AATCT**  
**ACCATCTACATATTTATTAATG**

Note: Red represents the joint sequence
